# Supplementary material for: Expression and Purification of Recombinant SARS-CoV-2 Accessory Protein ORF7a and Functional Analysis of Its Role in Up-Regulating Cytokine Production
Source: MDPI journal article supplement (doi:10.3390/covid2100104), 2022-10-12
Supplement: s1 [file s1]

## Supplementary material

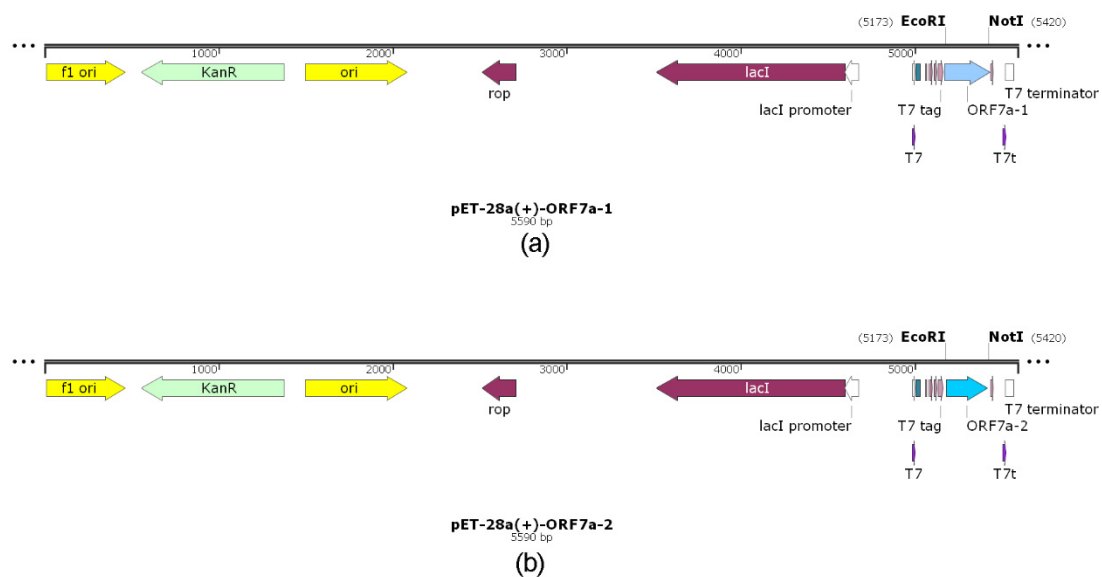

Figure S1. Scheme of DNA plasmids used for production of ectodomains of ORF7a-1 and ORF7a-2.
